# Supplementary material for: Pseudo-lithium vacancies in hydrogen rich Li 3 OCl
Source: Royal Society of Chemistry journal article supplement (doi:10.1039/d4ta08352k), 2025-01-01
Supplement: d4ta08352k1.pdf [file d4ta08352k1.pdf]

## Pseudo-Lithium Vacancies in Hydrogen Rich Li<sub>3</sub>OCl

### Supporting Information

Benjamin A. D. Williamson,<sup>1</sup> Kristoffer Eggestad,<sup>1</sup> and Sverre M. Selbach<sup>1</sup>

<sup>1</sup>Department of Materials Science and Engineering, NTNU Norwegian University of Science and Technology, Trondheim, Norway

#### 1. STRUCTURAL PROPERTIES

The calculated structural parameters and atomic distances are given in Table S1.

**Table S1:** The structural parameters of Li<sub>3</sub>OCl as calculated using the PBEsol and HSE06 functionals.

|        | spacegroup                   | a=b=c (Å) | $\alpha = \beta = \gamma$ (°) | d <sub>Li-O</sub> (Å) | d <sub>Li-Li</sub> (Å) | d <sub>Li-X</sub> (Å) |
|--------|------------------------------|-----------|-------------------------------|-----------------------|------------------------|-----------------------|
| HSE06  | <i>Pm</i> $\bar{3}$ <i>m</i> | 3.85      | 90.00                         | 1.92                  | 2.72                   | 2.72                  |
| PBEsol | <i>Pm</i> $\bar{3}$ <i>m</i> | 3.84      | 90.00                         | 1.92                  | 2.72                   | 2.72                  |

#### 2. ELECTRONIC STRUCTURE

The band structure and density of states (DOS) for Li<sub>3</sub>OCl is given in Figures S1. The DOS at the valence band maximum (VBM) and conduction band minimum (CBM) is shown, and a detailed breakdown of the percentage of states in terms of their elements and constituent orbitals is given in Table S2.

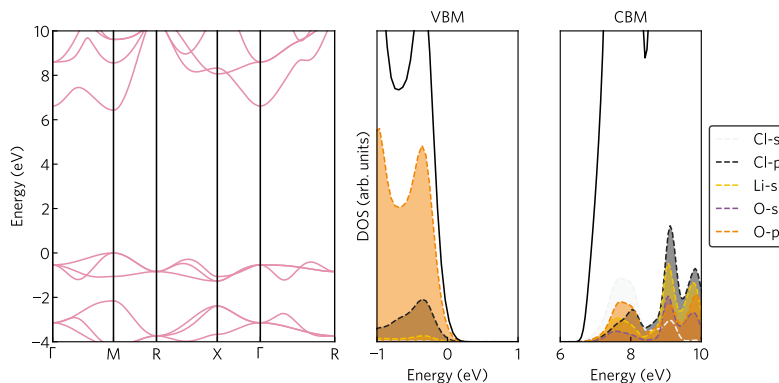

**Figure S1:** The electronic band structure and density of states (DOS) at the valence band maximum (VBM) and conduction band minimum (CBM) for Li<sub>3</sub>OCl as calculated using the HSE06 functional. For the band structure and DOS the VBM is centred at 0eV.

**Table S2:** The percentage of states at the valence band maximum (VBM) and conduction band minimum (CBM) of  $\text{Li}_3\text{OCl}$  as calculated using the HSE06 functional.

|   | VBM  |     |      |  | CBM  |      |     |
|---|------|-----|------|--|------|------|-----|
|   | Cl   | Li  | O    |  | Cl   | Li   | O   |
| s | 0.0  | 3.0 | 0.0  |  | 31.0 | 0.0  | 0.0 |
| p | 17.0 | 0.0 | 80.0 |  | 0.0  | 69.0 | 0.0 |
| d | 0.0  | 0.0 | 0.0  |  | 0.0  | 0.0  | 0.0 |

### 3. THERMODYNAMIC STABILITY AND DEFINING A TEMPERATURE-DEPENDENT CHEMICAL POTENTIAL SPACE

Due to the metastability of  $\text{Li}_3\text{OCl}$  a chemical stability region at 0K is not realisable due to the breakdown into constituent phases. *a priori* knowledge of the synthesis of a material can give insight into kinetically stabilised phases, such that calculation of the chemical potential stability region may be approximated through kinetic stabilisation towards one or more components on the phase diagram<sup>1</sup>. In terms of a wholly structure agnostic procedure to calculate the stability region, temperature dependence of the limiting phases of  $\text{Li}_3\text{OCl}$  must be calculated. In this study, the quasi harmonic approximation (QHA) is used in order to gain free energies from volume expansion and phonon calculations for each of the solid phases ( $\text{Li}_3\text{OCl}$ ,  $\text{LiClO}_4$ ,  $\text{Li}_2\text{O}$ ,  $\text{LiH}$ ,  $\text{LiOH}$ ,  $\text{LiCl}$ ). For the gas phases, ( $\text{O}_2$ ,  $\text{Cl}_2$ ,  $\text{H}_2$ ,  $\text{H}_2\text{O}$ ,  $\text{H}_2\text{O}_2$ ,  $\text{HCl}$ ), a straight forward gas phase approximation is used.

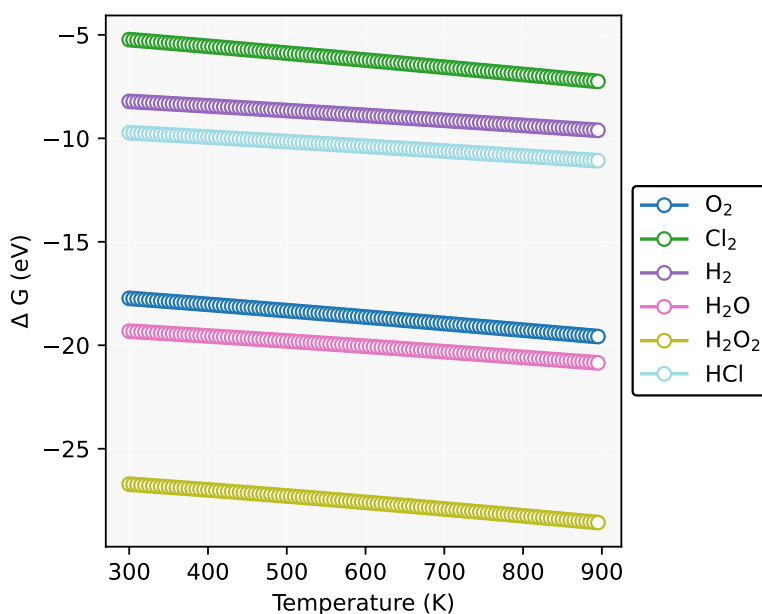

**Figure S2:** The Gibbs free energy of the gaseous species related to the limits of H-doped  $\text{Li}_3\text{OCl}$  using the PBEsol functional

**Table S3:** The calculation parameters and calculated total energy (per formula unit) for all the solid limiting phases using the HSE06 and PBEsol functionals.

| Compound            | Space group  | $k$ -point mesh       | HSE06 (eV) | PBEsol (eV) |
|---------------------|--------------|-----------------------|------------|-------------|
| Li <sub>3</sub> OCl | $Pm\bar{3}m$ | $5 \times 5 \times 5$ | -25.071    | -22.328     |
| Li <sub>2</sub> O   | $Fm\bar{3}m$ | $9 \times 9 \times 9$ | -18.030    | -13.959     |
| LiCl <sub>a</sub>   | $Fm\bar{3}m$ | $8 \times 8 \times 8$ | -10.169    | -6.904      |
| LiCl <sub>b</sub>   | $P6_3mc$     | $7 \times 7 \times 4$ | -20.409    | -13.734     |
| LiClO <sub>4</sub>  | $Pnma$       | $2 \times 2 \times 2$ | -44.0167   | -25.436     |
| LiH                 | $Fm\bar{3}m$ | $9 \times 9 \times 9$ | -6.663     | -5.996      |
| LiOH                | $P4/nmm$     | $7 \times 7 \times 5$ | -19.117    | -14.428     |

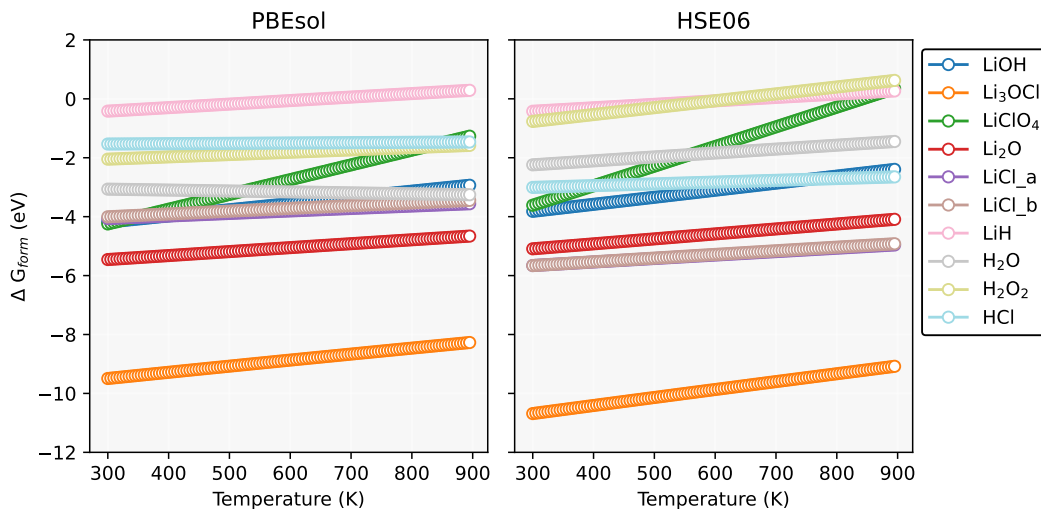

**Figure S3:** The Gibbs Free energies of formation as a function of temperature for each condensed phase limiting phase as calculated using the QHA approximation and the PBEsol functional.

#### 4. CHEMICAL POTENTIAL STABILITY REGION

**Table S4:** The chemical potential limits as calculated using the HSE06 functional within the QHA approximation at 750K. The chemical potential for hydrogen ( $\mu_H$ ) is included for reference for the doped species.

|   | $\mu_{Li}$ | $\mu_O$   | $\mu_{Cl}$ | ( $\mu_H$ ) |
|---|------------|-----------|------------|-------------|
| 0 | 0.000000   | -4.349200 | -5.141400  | 0           |
| 1 | -2.174600  | 0.000000  | -2.966800  | -0.826699   |

[H]

## 5. DETERMINATION OF THE “EXPERIMENTALLY ACCESSIBLE” OXYGEN CHEMICAL POTENTIAL REGION

The experimentally accessible  $\mu_{\text{O}}$  region can be determined using the equation outlined by Reuter and Scheffler<sup>2</sup>:

$$\mu_{\text{O}}(T, p^0) = \frac{1}{2}[H(T, p^0, \text{O}_2) - H(0\text{K}, p^0, \text{O}_2)] - \frac{1}{2}T[S(T, p^0, \text{O}_2) - S(0\text{K}, p^0, \text{O}_2)] \quad (1)$$

where T, H, and S are temperature, enthalpy, and entropy, respectively.  $p^0 = 1\text{atm}$  (with reference to a zero state;  $\mu_{\text{O}}(0\text{K}, p^0) = \frac{1}{2}E_{\text{O}_2}^{\text{total}} = 0$ ).<sup>3,4</sup>

## 6. GIBBS FREE ENERGY OF REACTION FOR SYNTHETIC ROUTES OF $\text{Li}_3\text{OCl}$

The synthetic routes for various synthesis methods as outlined in refs [5, 6] are given in equations 2-5 and corresponding Gibbs free energy of reaction ( $\Delta G_{\text{react}}$ ) as a function of temperature, calculated with HSE06, is presented in Figure S4. For Reactions 3-5 LiOH and LiH is present in the synthesis route, leading to the speculation that OH or H is present within the  $\text{Li}_3\text{OCl}$  lattice, or is indeed fully formed  $\text{Li}_2\text{OHCl}$  or other hydroxide analogues.<sup>6</sup> Reaction 2 is the only synthetic route where  $\text{Li}_3\text{OCl}$  is kinetically stabilised by LiCl and  $\text{Li}_2\text{O}$  and does not include OH in any form, however the reaction is slow and gives a low yield.<sup>5</sup> From our calculations, Reactions 4-5 possess negative free energies indicating spontaneous formation of  $\text{Li}_3\text{OCl}$ , consistent with the ease with which  $\text{Li}_3\text{OCl}$  is formed in experiment.<sup>5</sup> In reaction 3, spontaneous formation only occurs after 500K (226°C), which is  $\sim 100^\circ\text{C}$  below the experimental synthesis temperature. In Reaction 2, spontaneous formation is expected at 750K, ( $\sim 477^\circ\text{C}$ ) consistent with the experimental synthesis conditions of ( $\sim 500^\circ\text{C}$ ). The slow formation is expected due to poor correlation of  $\Delta G_{\text{react}}$  with experiment.

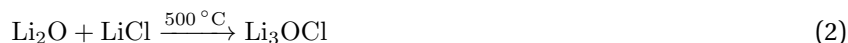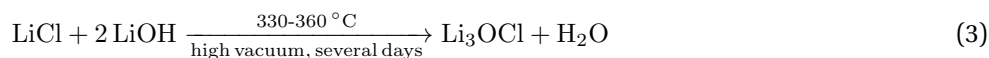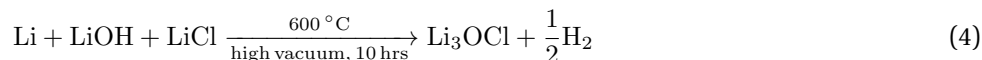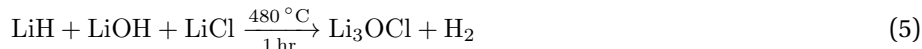

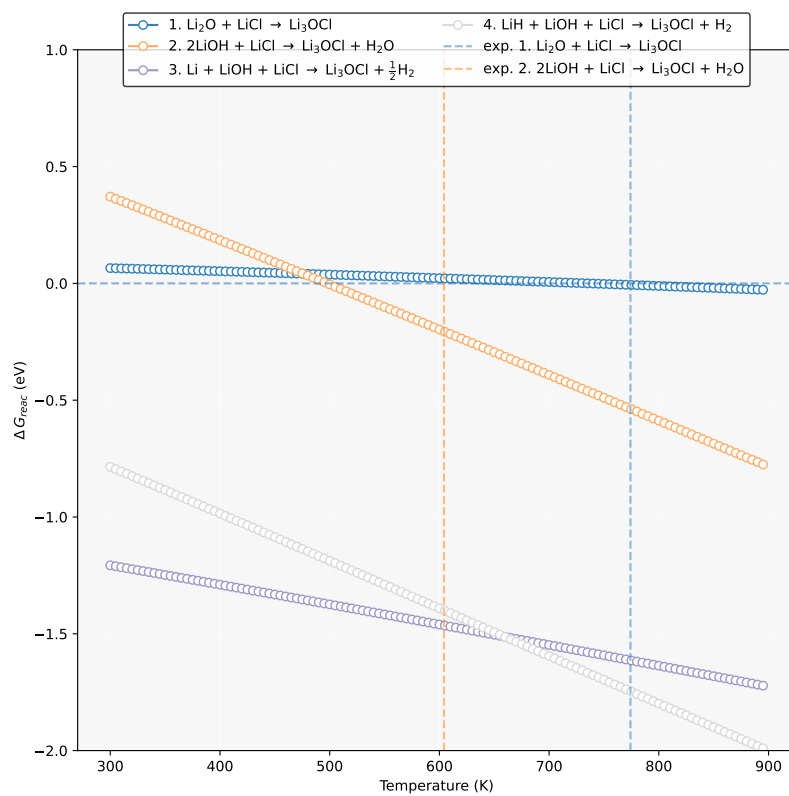

**Figure S4:** The Gibbs Free energy of reaction ( $\Delta G_{\text{reac}}$ ) for different synthetic routes given in equations 2-5 as calculated with the HSE06 functional. Experimental synthesis temperatures are given as dashed vertical lines taken from ref.[5].

## 7. DEFECT THERMODYNAMICS

**Table S5:** The tabulated total energies ( $E_{\text{total}}$ ), potential energy alignment ( $\Delta E^{\text{pot}}$ ), image charge correction ( $E_{\text{corr}}^{\text{IC}}$ ) and band filling correction ( $E_{\text{corr}}^{\text{BF}}$ ) for each *intrinsic* defect species and its constituent charge state ( $q$ ).

| Defect                 | $q$ | $E_{\text{total}}$ (eV) | $\Delta E^{\text{pot}}$ (eV) | $E_{\text{corr}}^{\text{IC}}$ (eV) | $E_{\text{corr}}^{\text{BF}}$ (eV) |
|------------------------|-----|-------------------------|------------------------------|------------------------------------|------------------------------------|
| Vacancies              |     |                         |                              |                                    |                                    |
| $V_{\text{Cl}}$        | 0   | -749.046                | 0.000                        | 0.000                              | 0.000                              |
|                        | 1   | -751.156                | -0.128                       | 0.076                              | 0.000                              |
| $V_{\text{Li}}$        | -1  | -751.610                | -0.055                       | 0.076                              | 0.000                              |
|                        | 0   | -752.332                | 0.000                        | 0.000                              | 0.000                              |
|                        | 0   | -743.079                | 0.000                        | 0.000                              | 0.000                              |
| $V_{\text{O}}$         | 1   | -747.193                | -0.009                       | 0.076                              | 0.000                              |
|                        | 2   | -750.558                | 0.005                        | 0.302                              | 0.000                              |
| Antisites              |     |                         |                              |                                    |                                    |
| $\text{Cl}_{\text{O}}$ | 0   | -748.645                | 0.000                        | 0.000                              | -0.068                             |
|                        | 1   | -755.114                | 0.113                        | 0.076                              | 0.000                              |
| $\text{O}_{\text{Cl}}$ | -1  | -758.797                | -0.099                       | 0.076                              | 0.000                              |
|                        | 0   | -760.091                | 0.000                        | 0.000                              | 0.000                              |
| Interstitials          |     |                         |                              |                                    |                                    |
| $\text{Cl}_{\text{i}}$ | -1  | -757.587                | 0.077                        | 0.076                              | 0.000                              |
|                        | 0   | -759.070                | 0.000                        | 0.000                              | 0.000                              |
| $\text{Li}_{\text{i}}$ | 0   | -756.333                | 0.000                        | 0.000                              | -0.130                             |
|                        | 1   | -762.816                | 0.029                        | 0.076                              | 0.000                              |
|                        | -2  | -759.700                | -0.037                       | 0.302                              | 0.000                              |
| $\text{O}_{\text{i}}$  | -1  | -763.173                | 0.014                        | 0.076                              | 0.000                              |
|                        | 0   | -764.469                | 0.000                        | 0.000                              | 0.000                              |

**Table S6:** The tabulated total energies ( $E_{\text{total}}$ ), potential energy alignment ( $\Delta E^{\text{pot}}$ ), image charge correction ( $E_{\text{corr}}^{\text{IC}}$ ) and band filling correction ( $E_{\text{corr}}^{\text{BF}}$ ) for each *extrinsic* species and its constituent charge state ( $q$ ).

| Defect            | $q$ | $E_{\text{total}}$ (eV) | $\Delta E^{\text{pot}}$ (eV) | $E_{\text{corr}}^{\text{IC}}$ (eV) | $E_{\text{corr}}^{\text{BF}}$ (eV) |
|-------------------|-----|-------------------------|------------------------------|------------------------------------|------------------------------------|
| H-doping          |     |                         |                              |                                    |                                    |
| H <sub>Cl</sub>   | 0   | -754.294                | 0.000                        | 0.000                              | 0.000                              |
|                   | -1  | -742.062                | -0.052                       | 0.076                              | 0.000                              |
| H <sub>O</sub>    | 0   | -746.508                | 0.000                        | 0.000                              | 0.000                              |
|                   | 1   | -752.659                | 0.002                        | 0.076                              | 0.000                              |
|                   | -1  | -756.312                | -0.035                       | 0.076                              | 0.000                              |
| H <sub>i</sub>    | 0   | -759.315                | 0.000                        | 0.000                              | 0.000                              |
|                   | 1   | -764.746                | 0.046                        | 0.076                              | 0.000                              |
| H-doping clusters |     |                         |                              |                                    |                                    |
|                   | -1  | -754.113                | -0.112                       | 0.076                              | 0.000                              |
| HH <sub>Cl</sub>  | 0   | -756.564                | 0.000                        | 0.000                              | 0.000                              |
|                   | 1   | -760.982                | -0.077                       | 0.076                              | 0.000                              |
| HO <sub>Cl</sub>  | 0   | -766.535                | 0.000                        | 0.000                              | 0.000                              |
|                   | -1  | -745.248                | -0.041                       | 0.076                              | -0.086                             |
| HH <sub>O</sub>   | 0   | -751.624                | 0.000                        | 0.000                              | 0.000                              |
|                   | 1   | -754.063                | 0.011                        | 0.076                              | 0.000                              |
|                   | 2   | -757.839                | 0.030                        | 0.302                              | 0.000                              |
|                   | -2  | -747.701                | 0.090                        | 0.302                              | -0.086                             |
| HCl <sub>O</sub>  | -1  | -747.701                | 0.090                        | 0.076                              | -0.086                             |
|                   | 0   | -754.251                | 0.000                        | 0.000                              | 0.000                              |
|                   | 1   | -756.228                | 0.123                        | 0.076                              | 0.000                              |
| HH <sub>i</sub>   | 0   | -764.405                | 0.000                        | 0.000                              | 0.000                              |
|                   | -1  | -767.730                | 0.001                        | 0.076                              | 0.000                              |
| HO <sub>i</sub>   | 0   | -769.278                | 0.000                        | 0.000                              | 0.000                              |
|                   | 0   | -762.342                | 0.000                        | 0.000                              | 0.000                              |

8. PARTIAL CHARGE DENSITIES FOR  $V_{Li}$ ,  $V_O$ , AND  $Li_i$ 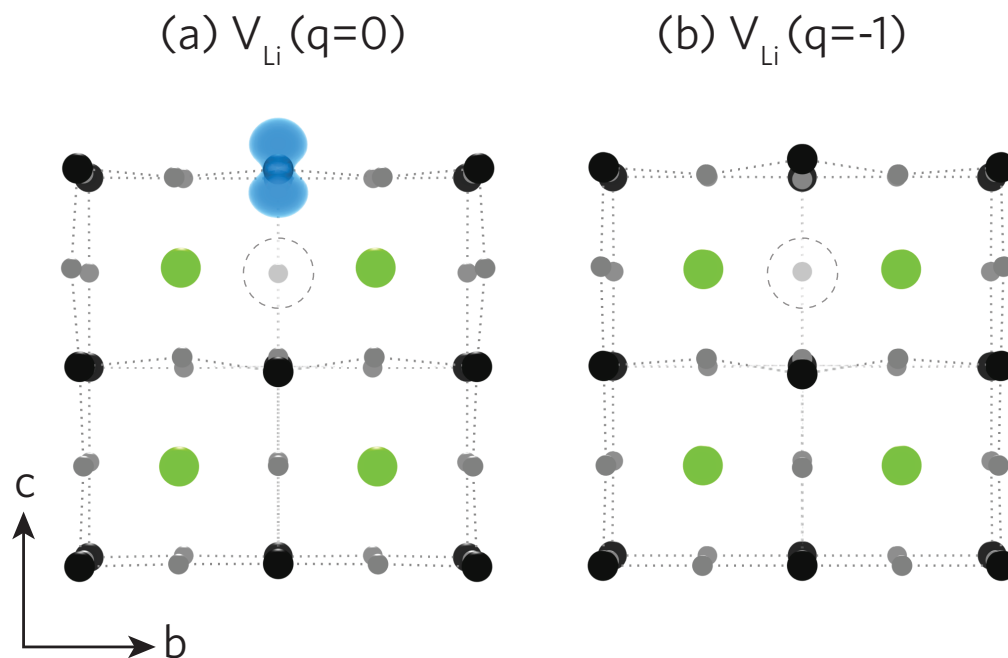

**Figure S5:** The partial charge densities for  $V_{Li}$  (dashed circle) in the  $q=0$  (a) and  $q=-1$  (b) charge states. The electron hole (blue) induced by  $V_{Li}$  is localised on an adjacent O 2p orbital. The colours correspond thus: Li = grey, O = black, Cl = green.

The partial charge density is plotted from 0-0.02  $\text{\AA}^{-1}$ .

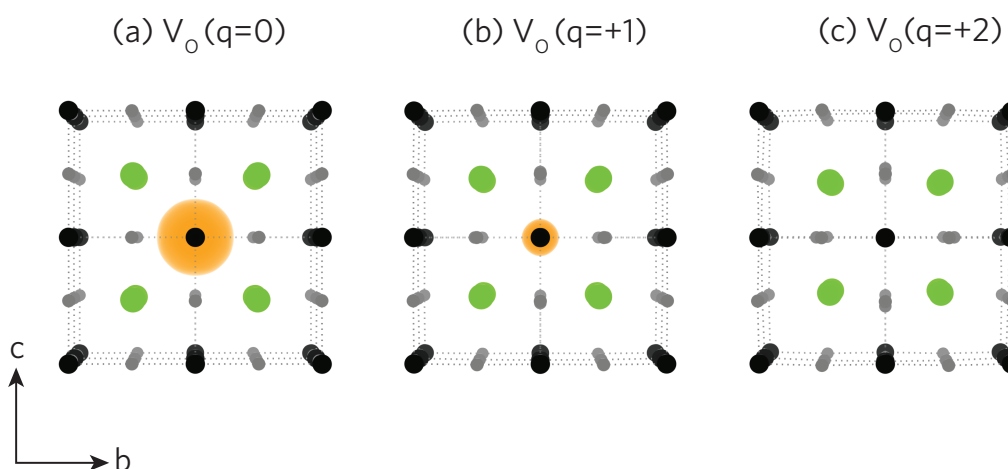

**Figure S6:** The partial charge densities for  $V_O$  in the  $q=0$  (a) and  $q=+1$  (b), and  $q=+2$  (c) charge states. The electron(s) (orange) induced by  $V_O$  is localised within the vacancy site. The colours correspond thus: Li = grey, O = black, Cl = green.

The partial charge density is plotted from 0-0.01  $\text{\AA}^{-1}$ .



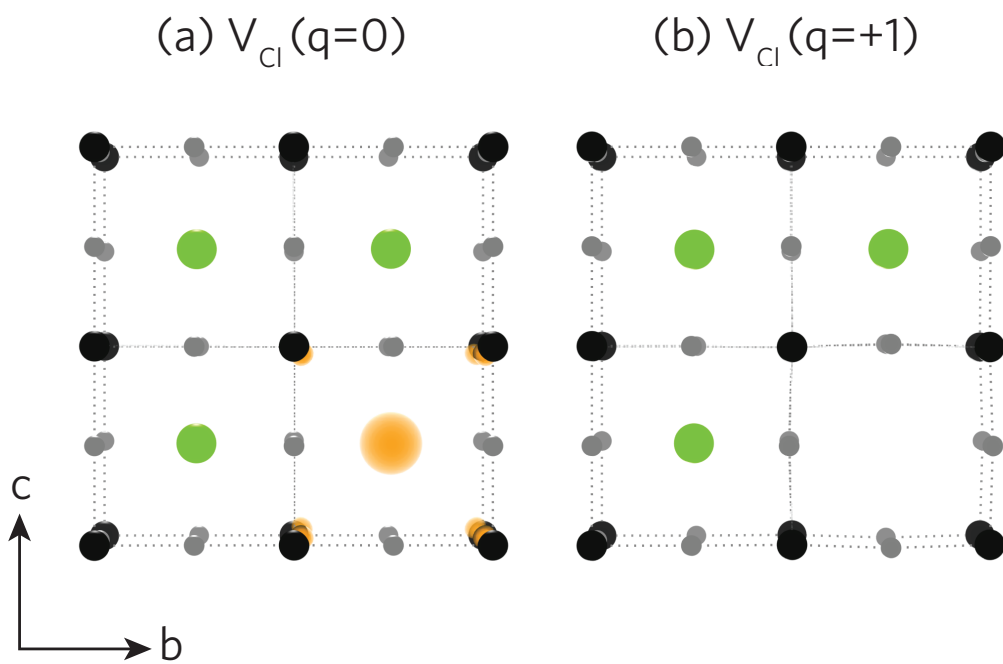

**Figure S7:** The partial charge densities for  $V_{Cl}$  in the  $q=0$  (a) and  $q=+1$  (b) charge states. The electron (orange) induced by  $V_{Cl}$  is localised within the vacancy site. The colours correspond thus: Li = grey, O = black, Cl = green. The partial charge density is plotted from 0-0.01  $\text{\AA}^{-1}$ .

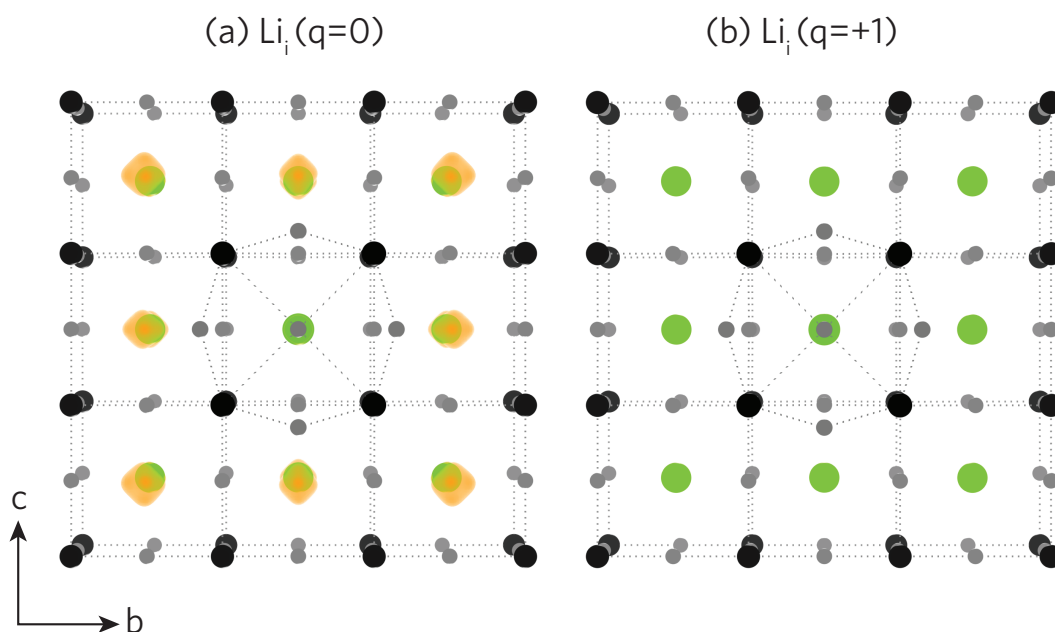

**Figure S8:** The partial charge densities for  $Li_i$  in the  $q=0$  (a) and  $q=+1$  (b) charge states. The electron (orange) induced by  $Li_i$  is delocalised across Cl s orbitals at the conduction band minimum. The colours correspond thus: Li = grey, O = black, Cl = green. The partial charge density is plotted from 0-0.0015  $\text{\AA}^{-1}$ . The cell has been shifted so that  $Li_i$  is centred.

- 
- [1] A. G. Squires, J. M. Dean, and B. J. Morgan, Chemrxiv **0.26434/chemrxiv-2021-hzrls** (2021).
- [2] K. Reuter and M. Scheffler, Phys. Rev. B **65**, 035406 (2001).
- [3] F. H. Taylor, J. Buckeridge, and C. R. A. Catlow, Chem. Mater. **28**, 8210 (2016).
- [4] J. E. N. Swallow, B. A. D. Williamson, T. J. Whittles, M. Birkett, T. J. Featherstone, N. Peng, A. Abbott, M. Farnworth, K. J. Cheetham, P. Warren, D. O. Scanlon, V. R. Dhanak, and T. D. Veal, Advanced Functional Materials **28**, 1701900 (2018).
- [5] S. Li, J. Zhu, Y. Wang, J. W. Howard, X. Lu, Y. Li, R. S. Kumar, L. Wang, L. L. Daemen, and Y. Zhao, Solid State Ionics **284**, 14 (2016).
- [6] I. Hanghofer, G. J. Redhammer, S. Rohde, I. Hanzu, A. Senyshyn, H. M. R. Wilkening, and D. Rettenwander, Chem. Mater. **30**, 8134 (2018).
